# Supplementary material for: Cardiovascular Implantable Electronic Devices Enabled Remote Heart Failure Monitoring; What We Have Learned and Where to Go Next
Source: MDPI journal article supplement (doi:10.3390/jcdd10040152), 2023-03-31
Supplement: s1 [file s1]

**Supplementary tables.**

**Table S1. Observational studies using single and multisensory monitoring**

|                    | No. patients        | NYHA class | EF (mean) | Study design                  | Sensor monitoring                            | Adapted treatment after alarm | Primary endpoint                                                                                                    | Effect of monitoring on the endpoints                       |
|--------------------|---------------------|------------|-----------|-------------------------------|----------------------------------------------|-------------------------------|---------------------------------------------------------------------------------------------------------------------|-------------------------------------------------------------|
| MED-HeFT (2005)    | 34                  | II-IV      | 31%       | Prospective                   | Uni-vector Intrathoracic impedance (Optivol) | No                            | HF hospitalization                                                                                                  | Sensitivity: 76.9%, FPR: 1.5 per patient-year               |
| FAST (2011)        | 155                 | II-IV      | =<35%     | Prospective                   | Univector intrathoracic impedance (Optivol)  | No                            | HF hospitalization, HF emergency visit, unscheduled in-office visit                                                 | Sensitivity: 74%<br>FPR 2.08 per patient-year               |
| InSync Snes (2007) | 372                 | II-III     | 25%       | Prospective                   | Univector Intrathoracic impedance (Optivol)  | No                            | Worsening HF including pulmonary congestion, peripheral edema, worsening NYHA classification. Increased body weight | Sensitivity: 60%<br>PPV 60%                                 |
| SENSE-HF (2011)    | 501 (371 completed) | I-IV       | 26%       | Prospective (Phase I blinded) | Univector Intrathoracic                      | In phase II and III           | <u>Phase I:</u><br>HF hospitalization with evidence of                                                              | <u>Phase I:</u><br>Sensitivity: 20.7% (dynamic sensitivity, |

|           |               |        |     |             |                                               |    |                                                                                                                                                                                                   |                                                                                                                                                                               |
|-----------|---------------|--------|-----|-------------|-----------------------------------------------|----|---------------------------------------------------------------------------------------------------------------------------------------------------------------------------------------------------|-------------------------------------------------------------------------------------------------------------------------------------------------------------------------------|
|           | phase II/III) |        |     |             | impedance (Optivol)                           |    | pulmonary congestion<br><br><u>Phase II/III:</u><br>worsening HF with evidence of pulmonary congestion                                                                                            | 40.1% in patient with the longest interval between device implant and hospital admission)<br><br>PPV: 4.7%<br><br><u>Phase II/III</u><br><br>Sensitivity: 39.0%<br>PPV: 38.1% |
| DEFEAT-PE | 144           | II-III | 25% | Prospective | Multi-vector intrathoracic impedance (Cor Vu) | No | Any hospitalization or emergency room visit for pulmonary congestion<br><br>or any urgent clinic visit requiring either intravenous diuretics<br><br>or vasoactive drugs for pulmonary congestion | Sensitivity: 21.6%<br><br>FPR: 0.9 per patient-year<br><br>PPV: 12.3                                                                                                          |

|             |     |        |       |             |                                                                                                                                                                                                                     |    |                                              |                                                                                           |
|-------------|-----|--------|-------|-------------|---------------------------------------------------------------------------------------------------------------------------------------------------------------------------------------------------------------------|----|----------------------------------------------|-------------------------------------------------------------------------------------------|
| PARTNERS HF | 694 | III-IV | =<35% | Prospective | Multiparametric, univector intrathoracic impedance in combination with<br><br>AF duration, ventricular rate during AF, fluid index, patient activity, night heart rate, HRV, % of CRT pacing, ICD shocks for VT/VF. | No | HF hospitalization with pulmonary congestion | More HF hospitalization in patients with positive diagnostic, HR: 5.5, 95% CI: 3.4 to 8.8 |
|-------------|-----|--------|-------|-------------|---------------------------------------------------------------------------------------------------------------------------------------------------------------------------------------------------------------------|----|----------------------------------------------|-------------------------------------------------------------------------------------------|

**Table S2. RCT 's using single- and multisensory monitoring**

| Study | Study design | Monitored data | Groups | Audible alerts | No. patients | NYHA Class | EF (mean) | Endpoints | Effect of monitoring on the end points |
|-------|--------------|----------------|--------|----------------|--------------|------------|-----------|-----------|----------------------------------------|
|-------|--------------|----------------|--------|----------------|--------------|------------|-----------|-----------|----------------------------------------|

|               |                         |                                                                                                                                                                                                                                                                                        |                            |    |                                                   |       |     |                                                                                                                                                                                                                                                                                                              |                                                                                                                                                                                                                                                                                                                                                                                                                                          |
|---------------|-------------------------|----------------------------------------------------------------------------------------------------------------------------------------------------------------------------------------------------------------------------------------------------------------------------------------|----------------------------|----|---------------------------------------------------|-------|-----|--------------------------------------------------------------------------------------------------------------------------------------------------------------------------------------------------------------------------------------------------------------------------------------------------------------|------------------------------------------------------------------------------------------------------------------------------------------------------------------------------------------------------------------------------------------------------------------------------------------------------------------------------------------------------------------------------------------------------------------------------------------|
| DOT-HF (2011) | Prospective, randomized | <p>Intrathoracic impedance (could activate alarm), Cardiac Compass diagnostic (after patient-physician contact): trends on heart rate variability, physical activity, arrhythmia incidence, percentage ventricular pacing, and other diagnostic information. No remote monitoring.</p> | Access arm vs. Control arm | On | 335 patients (168 access arm vs. 167 control arm) | II-IV | 25% | <p>Primary: combined all-cause mortality and HF hospitalization</p> <p>Secondary:</p> <p>a) All cause mortality</p> <p>b) HF hospitalization</p> <p>c) Number of outpatient visits</p> <p>d) Percentage of OptiVol threshold crossings associated with signs and symptoms of clinically relevant events.</p> | <p>Primary: 28% access arms vs 19% in control arm;<br/>HR 1.52, CI 0.97–2.37, P 0.063</p> <p>Secondary:</p> <p>a) 115 in access arm vs 8% in control arm; HR 1.24; 95% CI, 0.63–2.44; P 0.54;<br/>Figure 3B</p> <p>b) 35.7% in access arm vs 21.5% in control arm; HR 1.79; 95% CI, 1.08–2.95; P 0.022</p> <p>c) 250 in access arm vs 84 in control arm, P&lt;0.001</p> <p>d) for HF hospitalization HR 3.02 (1.52-5.98), P&lt;0.001</p> |
|---------------|-------------------------|----------------------------------------------------------------------------------------------------------------------------------------------------------------------------------------------------------------------------------------------------------------------------------------|----------------------------|----|---------------------------------------------------|-------|-----|--------------------------------------------------------------------------------------------------------------------------------------------------------------------------------------------------------------------------------------------------------------------------------------------------------------|------------------------------------------------------------------------------------------------------------------------------------------------------------------------------------------------------------------------------------------------------------------------------------------------------------------------------------------------------------------------------------------------------------------------------------------|

|                    |                                                          |                                                                                                            |                                                                                                                                            |                                                |                                                                                |                |       |                                                                                                                                                                                                                                                                                                                                                                            |                                                                                                                                                                                                                                                                                                                                                                                                                                                                                                                           |
|--------------------|----------------------------------------------------------|------------------------------------------------------------------------------------------------------------|--------------------------------------------------------------------------------------------------------------------------------------------|------------------------------------------------|--------------------------------------------------------------------------------|----------------|-------|----------------------------------------------------------------------------------------------------------------------------------------------------------------------------------------------------------------------------------------------------------------------------------------------------------------------------------------------------------------------------|---------------------------------------------------------------------------------------------------------------------------------------------------------------------------------------------------------------------------------------------------------------------------------------------------------------------------------------------------------------------------------------------------------------------------------------------------------------------------------------------------------------------------|
|                    |                                                          |                                                                                                            |                                                                                                                                            |                                                |                                                                                |                |       |                                                                                                                                                                                                                                                                                                                                                                            | for outpatient visits<br>HR 6.78 (4.03-11.4),<br>P<0.001                                                                                                                                                                                                                                                                                                                                                                                                                                                                  |
| OptiLink<br>(2016) | Prospective,<br>multicenter,<br>randomized,<br>unblinded | Remote monitoring<br>via Medtronic<br>CareLink (including<br>Optiviol). 75% of alerts<br>were transmitted. | Intervention group<br>(transfer of<br>fluid index<br>alerts<br>followed by<br>protocol<br>specific<br>intervention) vs<br>control<br>group | No<br>audible<br>alerts<br>for the<br>patients | 1002<br>patients<br>(505<br>intervention<br>group vs. 497<br>control<br>group) | NYHA<br>II-III | 26.7% | <p>Primary: composite of<br/>all-cause death and CV<br/>hospitalization</p> <p>Secondary:</p> <ul style="list-style-type: none"> <li>-all-cause mortality</li> <li>-cardiovascular<br/>mortality</li> <li>- composite of all-cause<br/>death and HF<br/>hospitalization</li> <li>-CV hospitalizations -HF<br/>hospitalizations -all-<br/>cause hospitalizations</li> </ul> | <p>Primary:</p> <p>18 and 24 months,<br/>59.0%, 52.7% in the<br/>intervention group vs<br/>56.1%, 47.8%) in<br/>control group, HR,<br/>0.87, CI 0.72–1.04, P=<br/>0.13</p> <p>After adjustment for<br/>prior HF<br/>hospitalization or IV<br/>diuretic: HR 0.84, CI<br/>0.70–1.02, P=0.07</p> <p>Secondary:</p> <p>All p values &gt;0.05</p> <p>After adjustment for<br/>prior HF<br/>hospitalization or IV<br/>diuretic:</p> <ul style="list-style-type: none"> <li>- combined all cause<br/>mortality and HF</li> </ul> |

|              |                                      |                                                                          |                     |    |                                    |            |     |                                                                                                                                                                                                                                                    |                                                                                                                                                                                                                                                                                                                                                                                       |
|--------------|--------------------------------------|--------------------------------------------------------------------------|---------------------|----|------------------------------------|------------|-----|----------------------------------------------------------------------------------------------------------------------------------------------------------------------------------------------------------------------------------------------------|---------------------------------------------------------------------------------------------------------------------------------------------------------------------------------------------------------------------------------------------------------------------------------------------------------------------------------------------------------------------------------------|
|              |                                      |                                                                          |                     |    |                                    |            |     |                                                                                                                                                                                                                                                    | hospitalization P=0.03, other secondary outcomes P>0.05                                                                                                                                                                                                                                                                                                                               |
| TRUST (2010) | Prospective, multicenter, randomized | Automatic remote monitoring of arrhythmia and device-specific parameters | HM vs. conventional | No | 1339 (908 HM vs. 431 conventional) | NYHA II-IV | 29% | <p>1<sup>st</sup> primary: No total in-hospital device evaluation</p> <p>2<sup>nd</sup> primary: adverse event rates (death stroke, events requiring surgical intervention)</p> <p>Secondary: detection time of clinically significant problem</p> | <p>1<sup>st</sup> primary: 2.1 vs 3.8 per patient year in HM vs conventional (P&lt;0.001)</p> <p>2<sup>nd</sup> primary: Survival 96.4% (CI 95.5%-97.6%) in HM vs 94.2% (CI 91.8%- 96.6%) in the conventional group (P=0.174)</p> <p>Stroke 0.3 vs 1.2 in HM vs conventional (P=0.120)</p> <p>Surgical evaluation 6.6 vs. 4.9% in HM vs. conventional (P=0.269)</p> <p>Secondary:</p> |

|                |                                            |                                                                                                                           |                                                                        |                                         |                                                       |            |       |                                                                                                                                           |                                                                                                                                                                                                           |
|----------------|--------------------------------------------|---------------------------------------------------------------------------------------------------------------------------|------------------------------------------------------------------------|-----------------------------------------|-------------------------------------------------------|------------|-------|-------------------------------------------------------------------------------------------------------------------------------------------|-----------------------------------------------------------------------------------------------------------------------------------------------------------------------------------------------------------|
|                |                                            |                                                                                                                           |                                                                        |                                         |                                                       |            |       |                                                                                                                                           | Median 1 d vs 35.5% in HM vs conventional (P<0.001).                                                                                                                                                      |
| CONNECT (2011) | Prospective, multicenter, randomized.      | Remote monitoring of arrhythmia and device-related alerts, via Medtronic CareLink. 55% successful transmissions           | Remote monitoring vs. standard in-clinic visits                        | On, Audible alerts for the patient off. | 1997 patients (1014 remote arm vs. 983 in-office arm) | NYHA II-IV | 28.9% | Primary: time from clinical event to clinical decision<br><br>Secondary: cardiovascular health care utilization                           | Primary: lower in remote arm vs in-office arm<br><br>Secondary: no difference, however lower total rate of in-clinic visits due to replacement of in-between visits with remote monitoring in remote arm. |
| EVOLVO (2012)  | Prospective, multicenter, randomized, open | Remote monitoring via Medtronic CareLink (evaluation of intrathoracic impedance, atrial arrhythmia, delivered ICD shocks) | Remote monitoring via CareLinks vs. standard care using audible alerts | On                                      | 200 patients (remote arm vs. standard arm)            | NYHA II-IV | 31%   | Primary: all emergency department visits and urgent in-office visits<br><br>Secondary:<br>- visits related to episodes of worsening of HF | Primary: 75 in remote arm vs 117 in standard arm, IRR 0.65, CI 0.49–0.88; P<0.005                                                                                                                         |

|                       |                                            |                                                                                                                                                                                                                                                                              |                                  |     |                                                               |             |     |                                                                                                                                                                                                                                                                                     |                                                                                                                                                                                                                                                                                                                                                                   |
|-----------------------|--------------------------------------------|------------------------------------------------------------------------------------------------------------------------------------------------------------------------------------------------------------------------------------------------------------------------------|----------------------------------|-----|---------------------------------------------------------------|-------------|-----|-------------------------------------------------------------------------------------------------------------------------------------------------------------------------------------------------------------------------------------------------------------------------------------|-------------------------------------------------------------------------------------------------------------------------------------------------------------------------------------------------------------------------------------------------------------------------------------------------------------------------------------------------------------------|
|                       |                                            |                                                                                                                                                                                                                                                                              |                                  |     |                                                               |             |     | - visits for<br>arrhythmias or ICD-<br>related episodes<br><br>- rate of total healthcare<br>use                                                                                                                                                                                    |                                                                                                                                                                                                                                                                                                                                                                   |
| IN-<br>TIME<br>(2014) | Prospective,<br>multicenter,<br>randomized | Telemonitoring data sent to Biotronik Home Monitoring Service Center (Ventricular and atrial tachyarrhythmia, low percentage of biventricular pacing, increase in the frequency of ventricular extrasystoles, decreased patient activity, abnormal intracardiac electrogram) | Telemonitoring vs. standard care | N/A | 664 patients (333 telemonitoring group vs. 331 control group) | NYHA II-III | 26% | Primary:<br><br>Worsening of a composite clinical score (death, overnight admission for worsening of heart failure, worsened of NYHA functional class and worsened self-assessment<br><br>Secondary: -all cause mortality<br>-hospital admission because of worsening heart failure | Primary: 18.9% in telemonitoring group vs. 27.2% in control group (OR 0.63, 95% CI 0.43–0.90, P=0.013)<br><br>Secondary:<br>-all cause mortality; 3.4% in telemonitoring group vs. 8.7% in control group (HR 0.36, 95% CI 0.17–0.74, P=0.004)<br>- hospital admission for worsening of heart failure: 44 in telemonitoring group vs. 47 in control group, P=0.38) |



|                     |                                        |                                                                                              |                                                  |                                                                                            |                                                       |            |       |                                                                                                                                                                                                                                                                                                                                                      |                                                                                                                                                                                                                        |
|---------------------|----------------------------------------|----------------------------------------------------------------------------------------------|--------------------------------------------------|--------------------------------------------------------------------------------------------|-------------------------------------------------------|------------|-------|------------------------------------------------------------------------------------------------------------------------------------------------------------------------------------------------------------------------------------------------------------------------------------------------------------------------------------------------------|------------------------------------------------------------------------------------------------------------------------------------------------------------------------------------------------------------------------|
| Luthje et al (2015) | Prospective, single-Center, randomized | Remote monitoring via Medtronic CareLink (including Optivol)                                 | Remote monitoring via CareLink vs. standard care | On, no audible alerts                                                                      | 176 patients (87 remote group vs. 89 control group)   | NYHA I-IV  | 31.9% | Primary: time to first HF-related hospitalization                                                                                                                                                                                                                                                                                                    | Primary: HR 1.231 ([0.621–2.438]; P=0.551)                                                                                                                                                                             |
| MORE-CARE (2017)    | Prospective, multicenter, randomized   | Remote monitoring via Medtronic CareLinks (including Optivol), 88.2% successful transmission | Remote arm via CareLink vs. standard arm         | On for Optivol, atrial arrhythmia and device integrity . Audible alert for the patient off | 865 patients (437 remote arm vs. 428 to standard arm) | NYHA II-IV | 27.3% | <p>Phase 1: time from device-detected event to clinical decision</p> <p>Phase 2:</p> <p>-primary: combined all-cause mortality and CV and device-related hospitalization.</p> <p>-Secondary: a)the utilization of healthcare resources for CV reasons</p> <p>b) the number of hospitalizations, ED admissions, and outpatient visits separately;</p> | <p>Phase 1</p> <p>Phase 2:</p> <p>-primary: 28.7% in remote arm vs 34.3% in standard arm (P=0.89)</p> <p>-secondary</p> <p>a) IRR 0.62 ( 0.58–0.66), P &lt;0.001,</p> <p>b)</p> <p>-all cause hospitalization: IRR</p> |

|               |                                                  |                                           |                                 |     |                                                       |            |       |                                                                                                                                                        |                                                                                                                                                                                                                                                                                      |
|---------------|--------------------------------------------------|-------------------------------------------|---------------------------------|-----|-------------------------------------------------------|------------|-------|--------------------------------------------------------------------------------------------------------------------------------------------------------|--------------------------------------------------------------------------------------------------------------------------------------------------------------------------------------------------------------------------------------------------------------------------------------|
|               |                                                  |                                           |                                 |     |                                                       |            |       | <p>c) the costs related to utilization of healthcare resources for CV and device reasons</p> <p>d) the safety of RM in CRT-D patient management.</p>   | <p>1.02 (0.83-1.26), , P=0.83</p> <p>-ED admissions: IRR 0.72 (0.53–0.98), P=0.037</p> <p>-outpatient visits: IRR 0.59 (0.56–0.62), P&lt;0.001</p> <p>c)Cost saving of remote arm €2899 per 100 patients at 2 years</p> <p>d) AER 55 in remote arm vs 53 in standard arm, P=0.92</p> |
| REM-HF (2017) | Prospective, multicenter, randomized, open-label | Remote monitoring different manufacturers | Remote monitoring vs usual care | Off | 1650 patients (824 remote monitoring, 826 usual care) | NYHA II-IV | 29.9% | <p>Primary: 1st event of the composite of death from any cause or an unplanned hospitalization for cardiovascular reasons</p> <p>Secondary: -death</p> | <p>Primary: 42.4% in remote group vs 40.8% usual care group, HR 1.01, CI 0.87-1.18, P=0.87</p> <p>Secondary: all p-values &gt;0.05</p>                                                                                                                                               |

|  |  |  |  |  |  |  |  |                                                                                                                                                                                                                                                                                                                                                                                                                                                                                |  |
|--|--|--|--|--|--|--|--|--------------------------------------------------------------------------------------------------------------------------------------------------------------------------------------------------------------------------------------------------------------------------------------------------------------------------------------------------------------------------------------------------------------------------------------------------------------------------------|--|
|  |  |  |  |  |  |  |  | <p>from any cause</p> <ul style="list-style-type: none"><li>-cardiovascular death</li><li>- non-cardiovascular death</li><li>-cardiovascular-related death or unplanned cardiovascular hospitalization</li><li>- death from any cause or unplanned hospitalization for noncardiovascular</li></ul> <p>Reason</p> <ul style="list-style-type: none"><li>-unplanned cardiovascular hospitalization</li><li>- unplanned hospitalization for non-cardiovascular reasons.</li></ul> |  |
|--|--|--|--|--|--|--|--|--------------------------------------------------------------------------------------------------------------------------------------------------------------------------------------------------------------------------------------------------------------------------------------------------------------------------------------------------------------------------------------------------------------------------------------------------------------------------------|--|
